# Supplementary material for: Sr2+ sorption property of seaweed-like sodium titanate mats: effects of crystallographic properties
Source: Royal Society of Chemistry journal article supplement (doi:10.1039/d1ra03088d), 2021-01-01
Supplement: d1ra03088d1.pdf [file d1ra03088d1.pdf]

## Supporting Information

### **Sr<sup>2+</sup> sorption property of seaweed-like sodium titanate mats: effects of crystallographic properties**

Yoshifumi Kondo,<sup>a,b</sup> Tomoyo Goto,<sup>\*, a,c</sup> and Tohru Sekino<sup>\*,a</sup>

<sup>a</sup>The Institute of Scientific and Industrial Research (ISIR-SANKEN), Osaka University,  
8-1 Mihogaoka, Ibaraki, Osaka 567-0047, Japan

<sup>b</sup>Division of Materials and Manufacturing Science, Graduate School of Engineering,  
Osaka University, 2-1 Yamadaoka, Suita, Osaka 565-0871, Japan

<sup>c</sup>Institute for Advanced Co-Creation Studies, Osaka University, 1-1 Yamadaoka, Suita,  
Osaka 565-0871, Japan

## Table of contents

|                                                                 | Pages           |
|-----------------------------------------------------------------|-----------------|
| <b>Materials</b>                                                | <b>S3</b>       |
| <b>Preparation and Sr sorption test of protonated titanates</b> | <b>S3</b>       |
| <b>Figure S1 – S9</b>                                           | <b>S4 – S12</b> |
| <b>Table S1 – S2</b>                                            | <b>S13</b>      |

## **Materials**

Titanium sulfate solution ( $\text{Ti}(\text{SO}_4)_2$ , 30 %), sodium hydroxide (NaOH, 97.0 %), titanium dioxide (anatase, 98.5 %), strontium chloride ( $\text{SrCl}_2$ , 95.0 %), and strontium carbonate ( $\text{SrCO}_3$ , 99.99 %) were purchased from FUJIFILM Wako Pure Chemical Corporation, Osaka, Japan. Sodium metatitanate ( $\text{Na}_2\text{Ti}_3\text{O}_7$ ) was obtained from Sigma-Aldrich Co. LLC., St. Louis, United States. All chemicals were used as received without further purification.

## **Preparation and Sr sorption test of protonated titanates**

To investigate the effects of  $\text{H}^+$  on ion-exchange reaction of titanates, protonated titanates of T10M and T15M were prepared. T10M and T15M were well-washed using the 1M HCl shaking for 30 min. They were marked as T10M\_HCl and T15M\_HCl, respectively. After that, Sr sorption test was conducted by using the procedure described above.

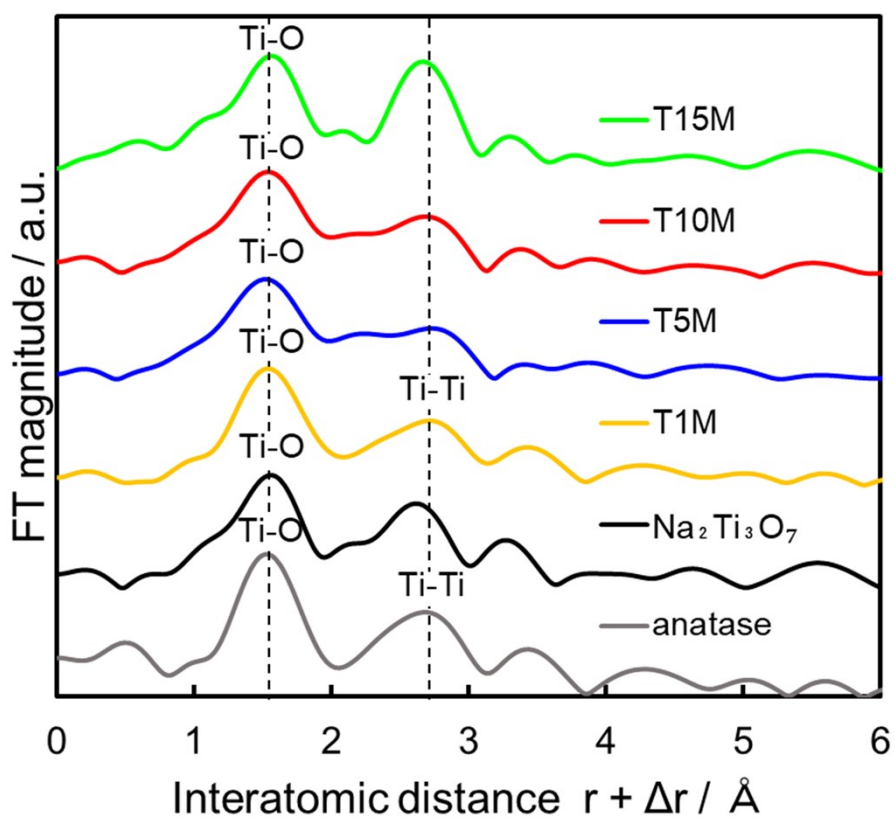

**Fig. S1** Ti K-edge FT-EXAFS spectra of the reference samples (anatase and  $\text{Na}_2\text{Ti}_3\text{O}_7$ ) and TXM samples.

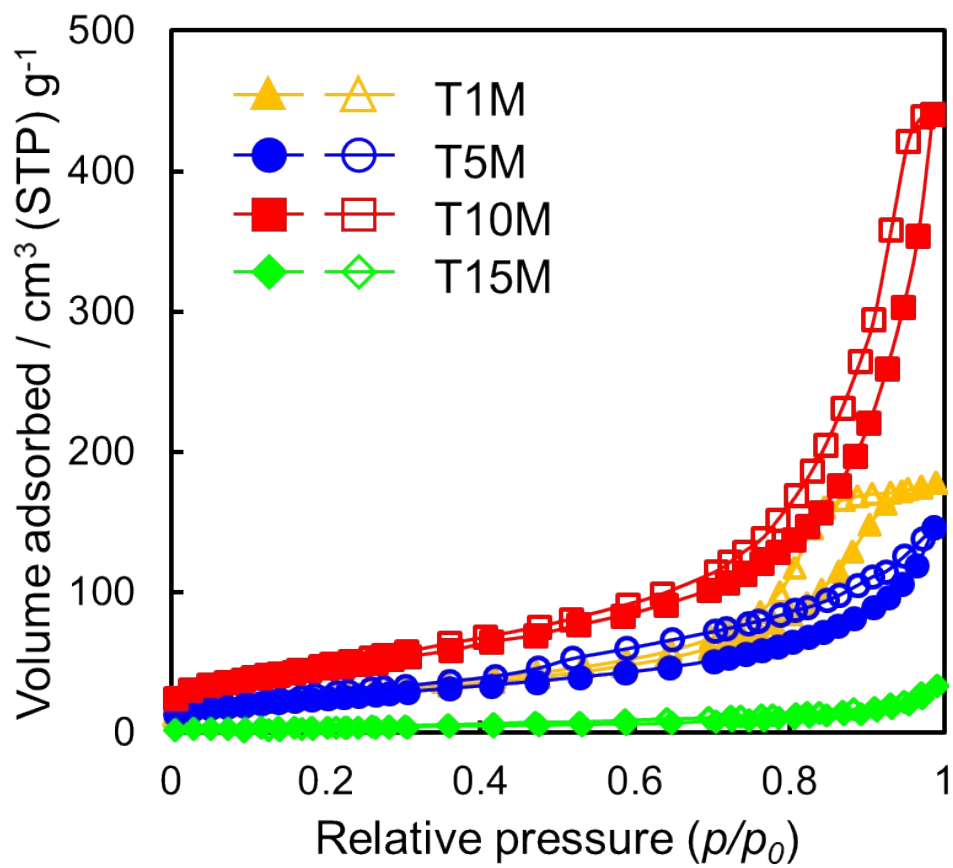

**Fig. S2** N<sub>2</sub> adsorption-desorption isotherms of TXM sample.

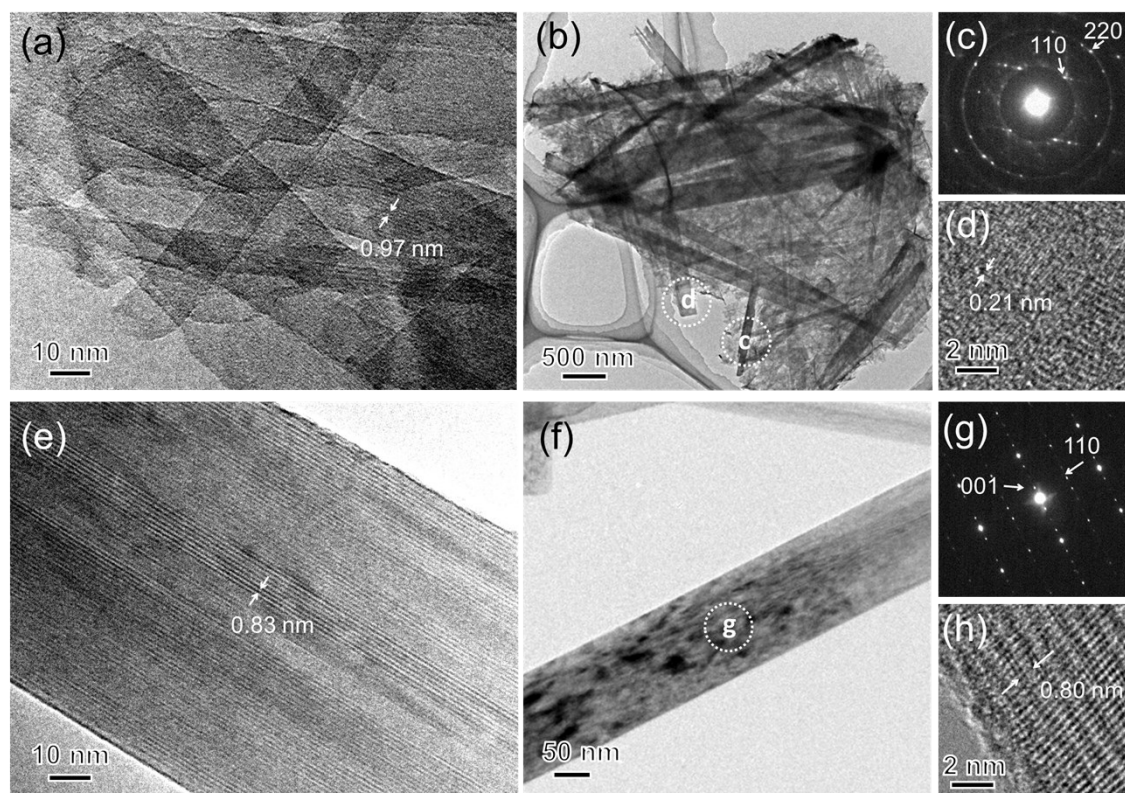

**Fig. S3** TEM images, SAED pattern, and HRTEM images of the (a-d) T5M and (e-h) T15M samples.

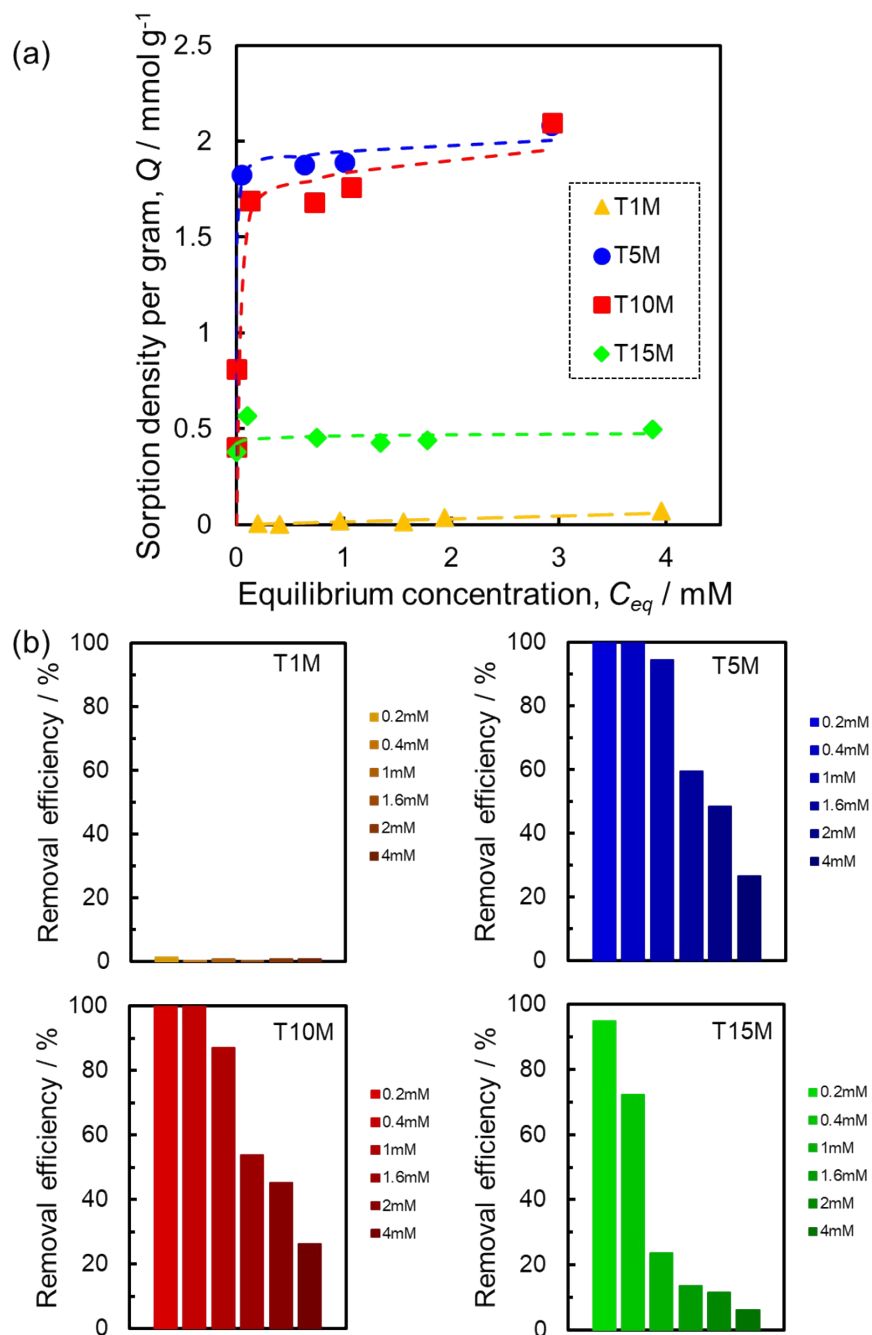

**Fig. S4** (a)  $Sr^{2+}$  sorption isotherms fitted with the Freundlich plot of TXM samples, and (b) removal efficiency of  $Sr^{2+}$  regarding initial concentration of each TXM sample.

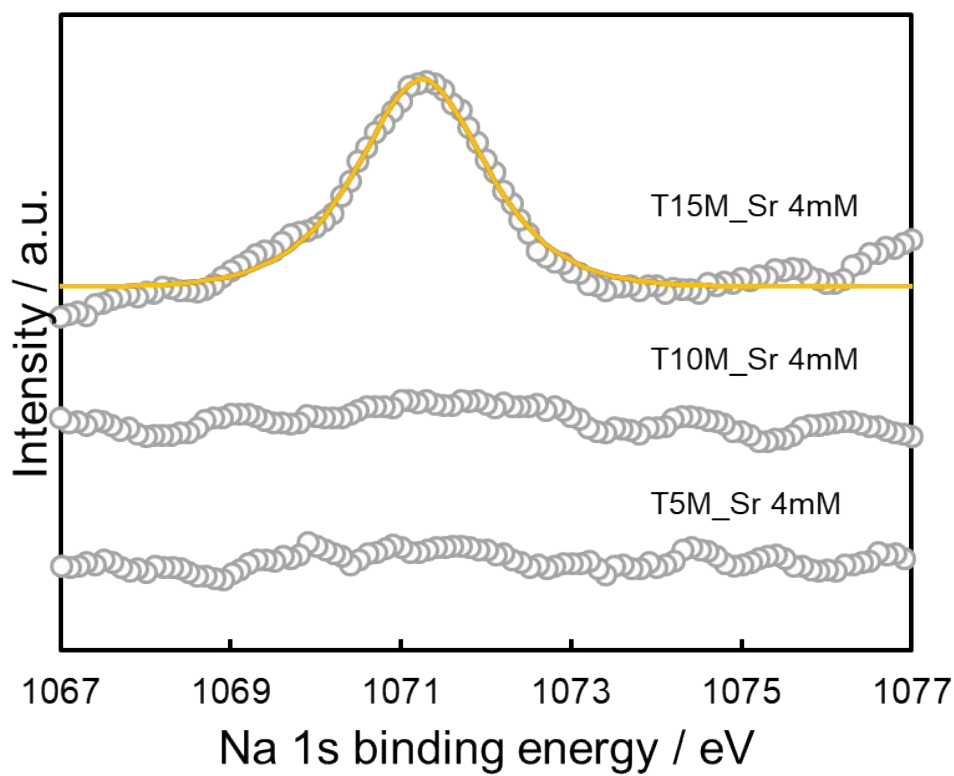

**Fig. S5** Na 1s XPS spectra of T5M, T10M and T15M after the sorption test using 4 mM SrCl<sub>2</sub> solution.



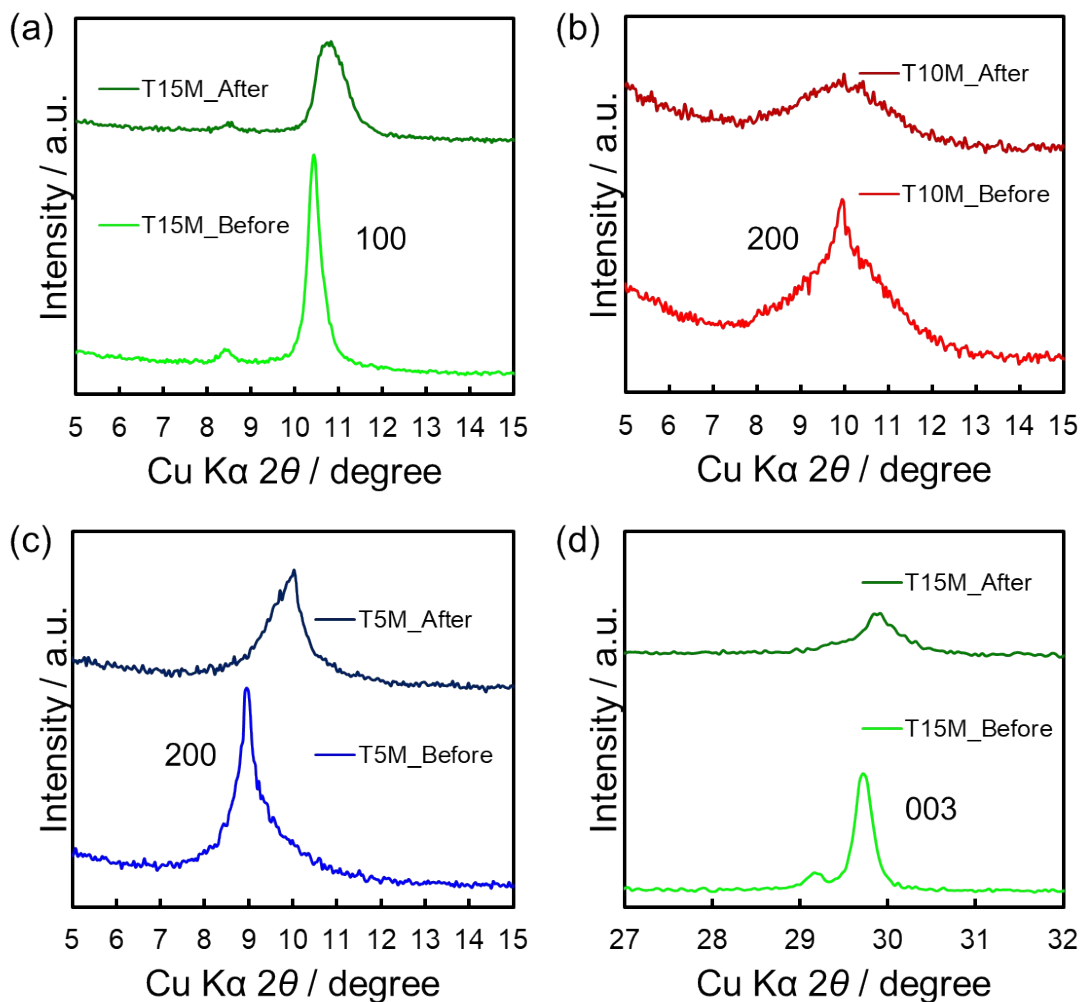

**Fig. S6** Enlarged XRD patterns of TXM samples before and after the sorption test using 4 mM SrCl<sub>2</sub> solution: (a) T15M in the range of 5° to 15°, (b) T10M in the range of 5° to 15°, (c) T5M in the range of 5° to 15°, and (d) T15M in the range of 27° to 32°.

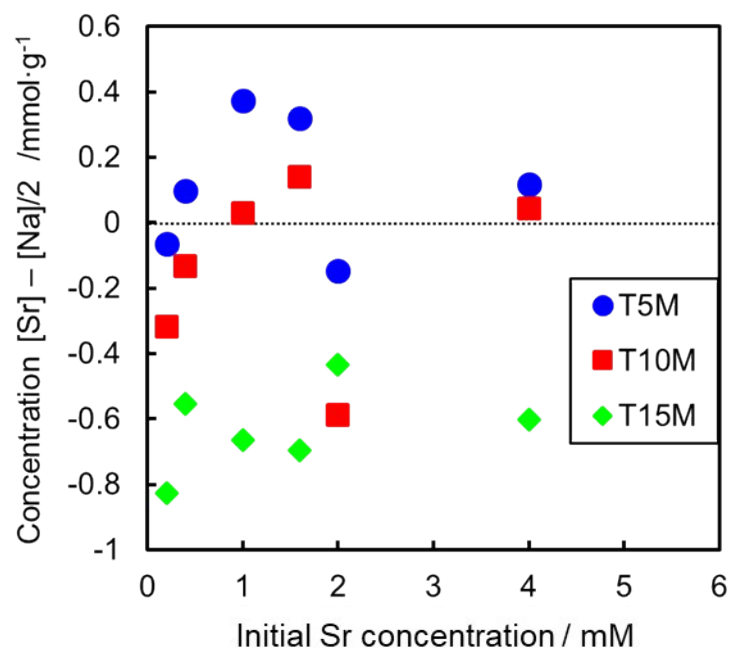

**Fig. S7** Changes in the concentration of subtracted sorption [Sr] from released [Na]/2 against the initial Sr concentration after the sorption test.

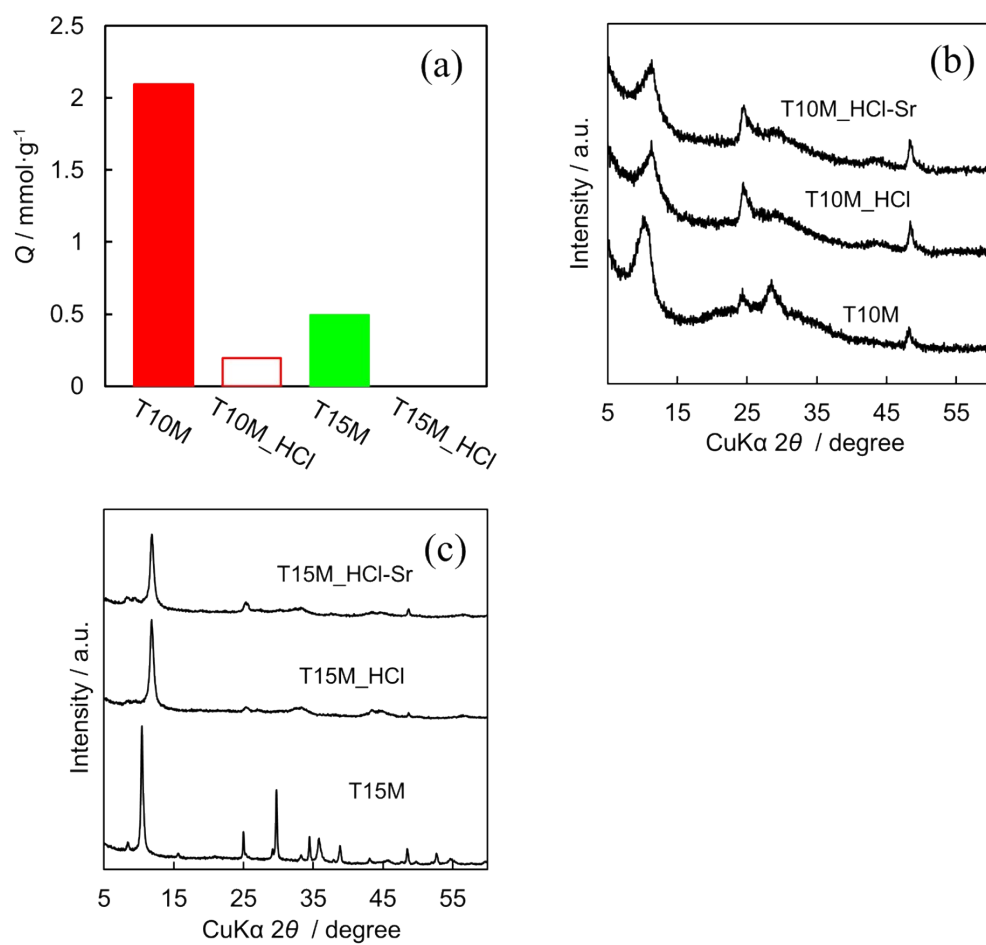

**Fig. S8** (a) Sorption density of Sr on samples with or without HCl washing, and XRD pattern of (b) T10M and (c) T15M samples before and after Sr sorption test.

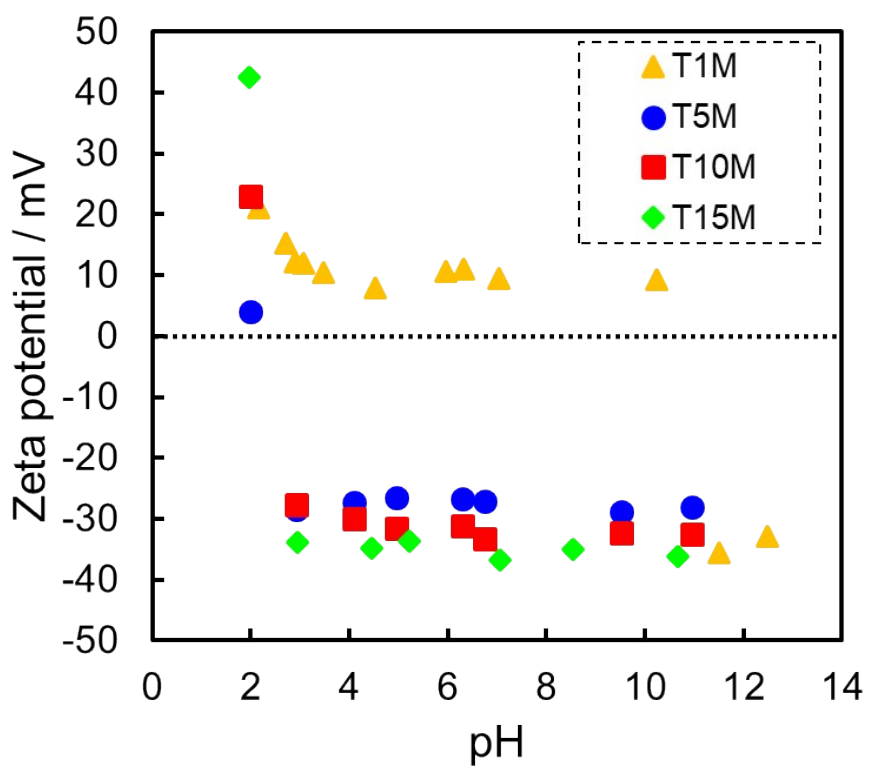

**Fig. S9** pH dependence of zeta potential of TXM samples. The pH of test solution was adjusted to 2-13 by additions of HCl and NaOH solutions.

**Table S1** Langmuir isotherm and Freundlich isotherm constants for Sr<sup>2+</sup> sorption on TXM Samples.

| Sample | Langmuir              |                 |       | Freundlich                                |       |       |
|--------|-----------------------|-----------------|-------|-------------------------------------------|-------|-------|
|        | $Q_{max}$<br>(mmol/g) | $K$<br>(L/mmol) | $r^2$ | $K_F$<br>(mmol/g(L/mmol) <sup>1/n</sup> ) | $1/n$ | $r^2$ |
| T1M    | -0.08                 | -0.12           | 0.09  | 0.01                                      | 0.98  | 0.77  |
| T5M    | 2.08                  | 34.58           | 1.00  | 1.95                                      | 0.03  | 0.67  |
| T10M   | 2.09                  | 14.99           | 0.99  | 1.83                                      | 0.06  | 0.59  |
| T15M   | 0.49                  | 14.01           | 0.99  | 0.46                                      | 0.02  | 0.10  |

**Table S2** The value of  $d_{200}$  of T5M and T10M, and  $d_{100}$  of T15M samples before and after Sr<sup>2+</sup> sorption test using 4 mM SrCl<sub>2</sub> solution.

| Sample | $d_{h00}$ before <sup>a</sup> (Å) | $d_{h00}$ after <sup>a</sup> (Å) |
|--------|-----------------------------------|----------------------------------|
| T5M    | 9.87                              | 8.93                             |
| T10M   | 8.88                              | 8.87                             |
| T15M   | 8.40                              | 8.34                             |

<sup>a</sup> Calculated by the Bragg equation.
